# Supplementary material for: The effect of incident tuberculosis on immunological response of HIV patients on highly active anti-retroviral therapy at the university of Gondar hospital, northwest Ethiopia: a retrospective follow-up study
Source: PubMed Central journal article supplement (PMC4158052; doi:10.1186/1471-2334-14-468), 2014-08-27

# Kaplan-Meier survival curves

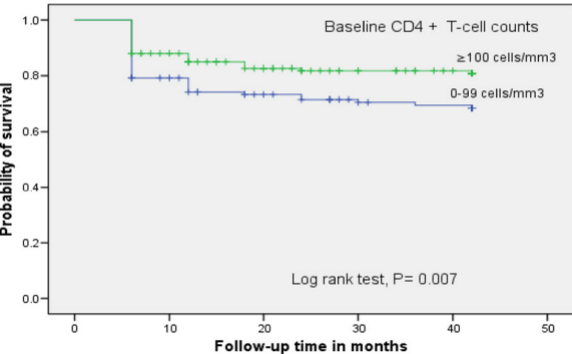

Supplement: 12879_2014_3767_MOESM3_ESM.pdf [file 12879_2014_3767_MOESM3_ESM.pdf]
